# Supplementary material for: Genetic and Dietary Iron Overload Differentially Affect the Course of Salmonella Typhimurium Infection
Source: PubMed Central journal article supplement (PMC5387078; doi:10.3389/fcimb.2017.00110), 2017-04-11
Supplement: Presentation1.pdf [file Presentation1.pdf]

1 **Supplementary figure 1.**

2

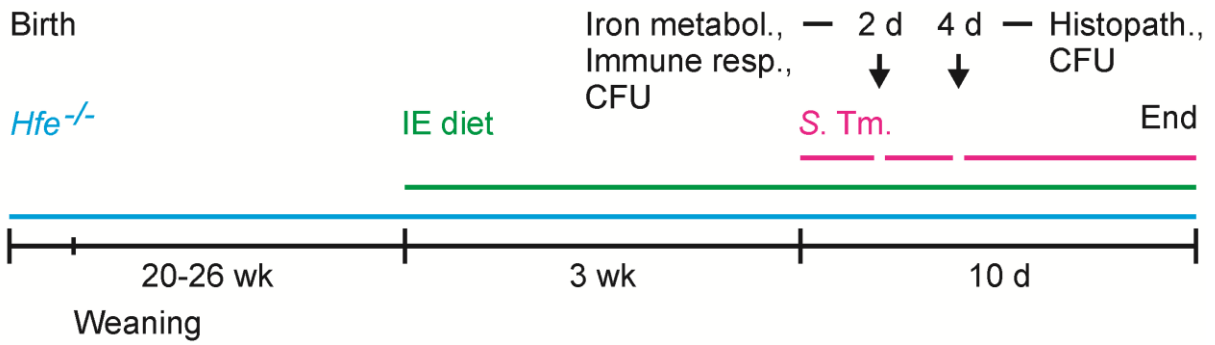

3

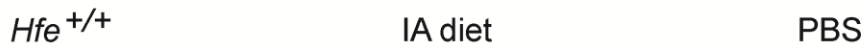

4

5

6

7

8

9

10

11

12

13

14

15

16

17

18

19

20

21

22

23

24

25

26

27

28

1 **Supplementary figure 2.**

2

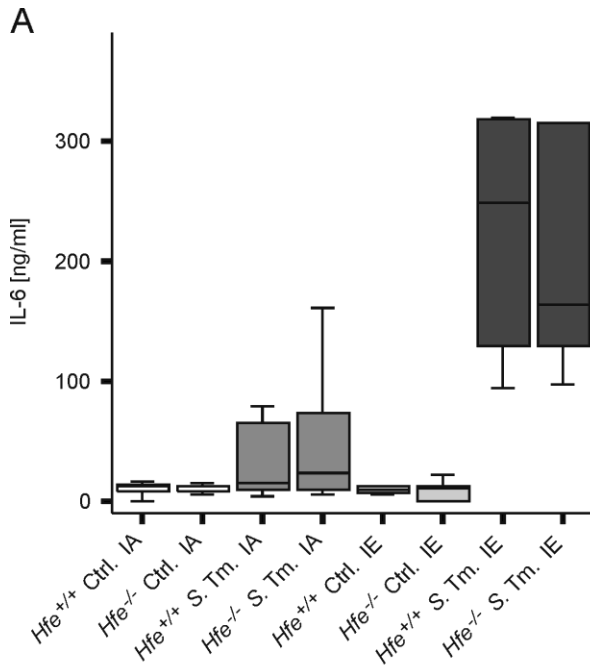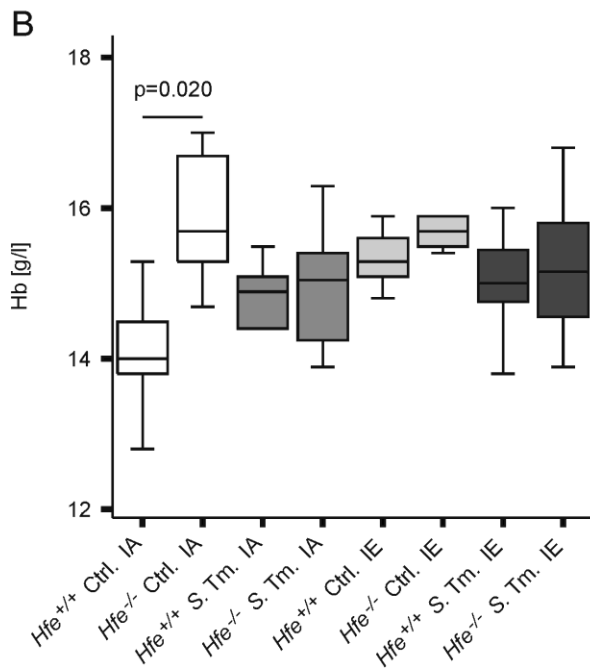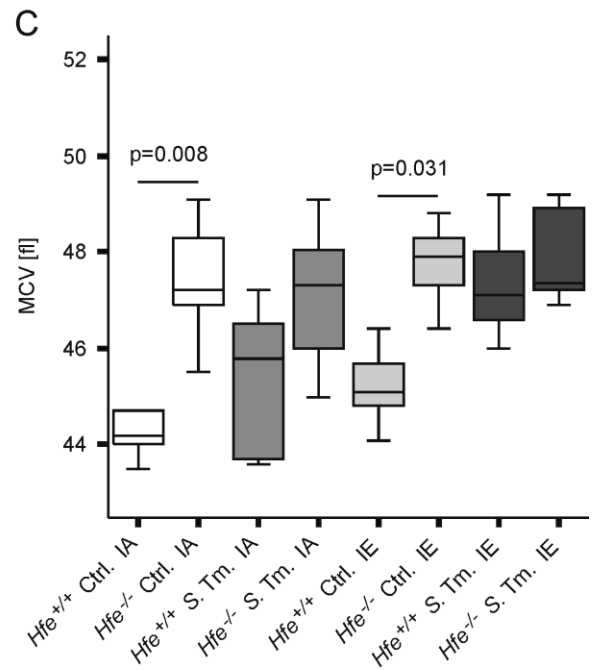

3

4

5

6

7

8

9

1 **Supplementary figure 3.**

2

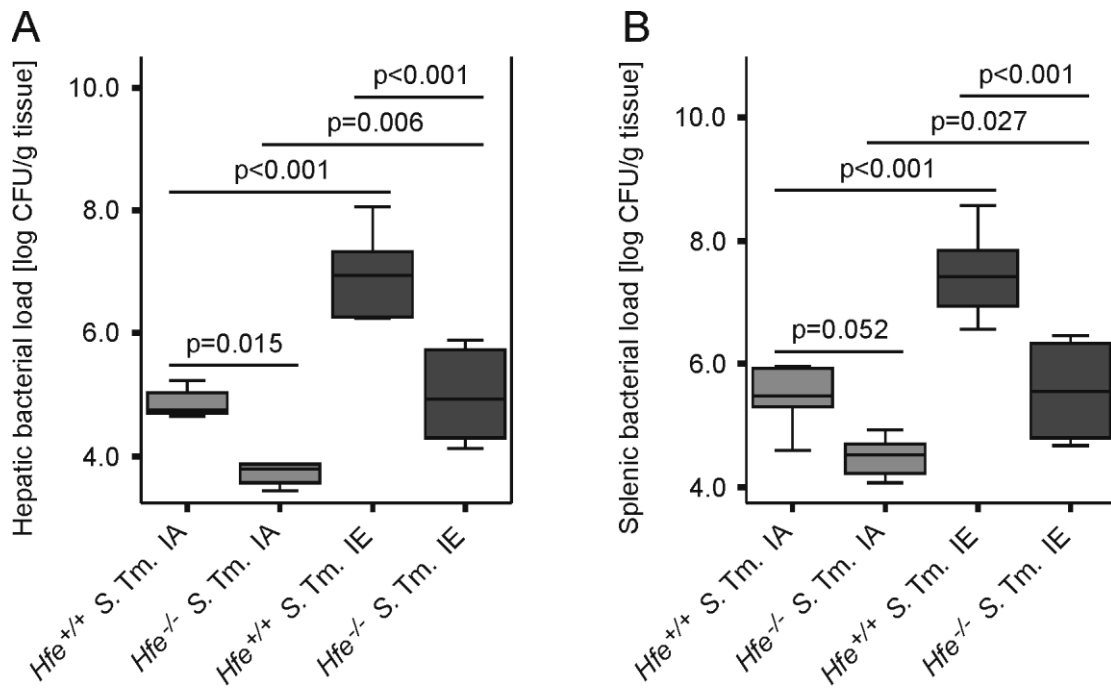

5 **Supplementary figure 4.**

6

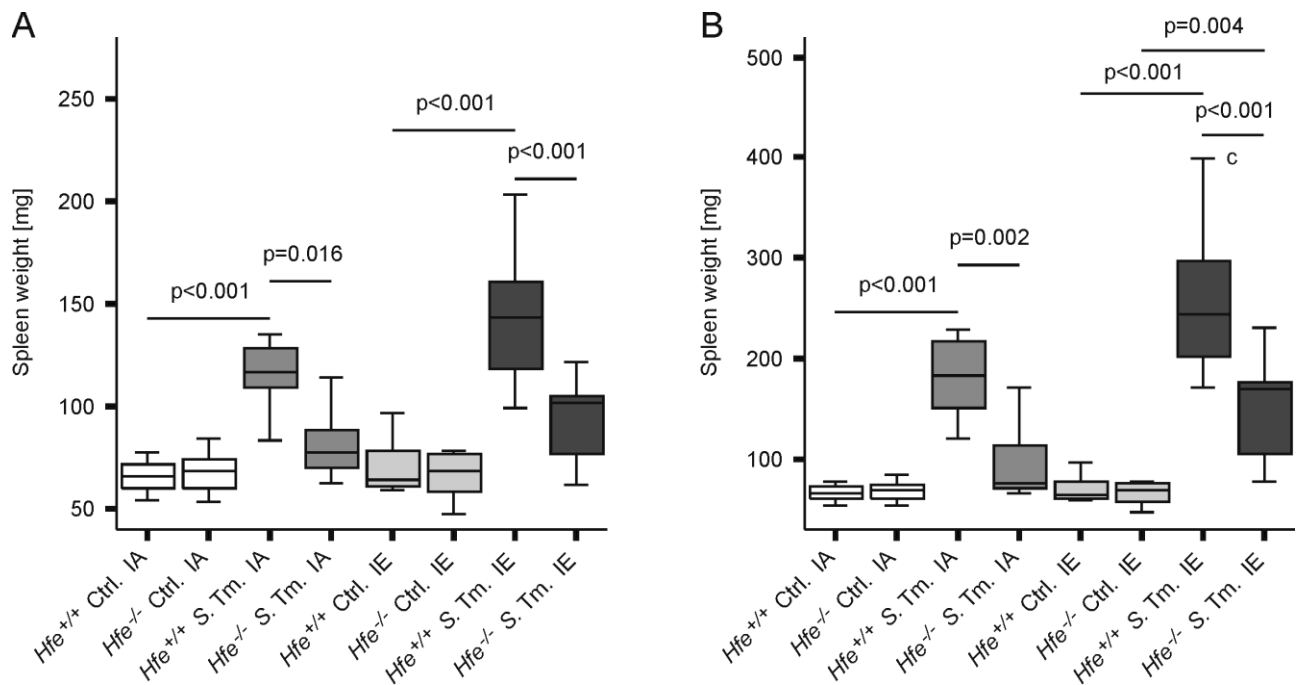

1 **Supplementary figure 1.**

2 **Experimental design.**

3 Male *Hfe*<sup>-/-</sup> and congenic C57BL/6 WT animals (*Hfe*<sup>+/+</sup>) were weaned at 4 wk of age  
4 and then kept on a standard iron-adequate (IA) rodent diet before enrollment in the study at  
5 20-26 wk of age. Subsequently, mice were either maintained on the IA diet or switched to an  
6 iron-enriched diet (IE) for 3 wk prior to and during the actual infection. Mice were then  
7 infected i.p. with 500 CFU of *S. Typhimurium* (*S. Tm.*) or injected with phosphate-buffered  
8 saline (PBS) as diluent. Mice were monitored for up to 10 d. On d 2 (48 h) and d 4 (96 h)  
9 after the inoculation, randomly selected mice were sacrificed to enumerate colony-forming  
10 units (CFU) of bacteria (d 2 and d 4) and study iron metabolism and the immune response (d  
11 2) as well as histopathologic findings (d 4). The expression of bacterial iron metabolic genes  
12 was also evaluated on d 2 post-infection. Note that the x-axis representing the timeline has an  
13 arbitrary rather than linear scale.

14

15 **Supplementary figure 2.**

16 **Serum IL-6, hemoglobin and mean corpuscular volume**

17 *Hfe*<sup>-/-</sup> and congenic C57BL/6 WT animals (*Hfe*<sup>+/+</sup>) were fed either a standard iron-  
18 adequate diet (IA) or an iron-enriched diet (IE) and infected i.p. with 500 CFU of *S.*  
19 *Typhimurium* (*S. Tm.*). Mock-infected controls (Ctrl.) received diluent. Serum IL-6 levels  
20 (A), hemoglobin (Hb) concentration (B), and mean corpuscular volume (MCV), an  
21 erythrocyte index (C), were measured at baseline (PBS) and 48 h after infection. Data are  
22 presented and compared exactly as in figure 1. Intriguingly, hemoglobin (Hb) levels were  
23 unaffected by iron and infection, although under steady-state conditions, *Hfe*<sup>-/-</sup> mice tended to  
24 have higher Hb levels as compared to congenic WT mice (Suppl. fig. 2B). Similarly,  
25 erythrocytes of *Hfe*<sup>-/-</sup> mice had higher mean corpuscular volumes (MCV) as compared to WT  
26 mice (Suppl. fig. 2C).

27

28 **Supplementary figure 3.**

29 **Bacterial load in livers and spleens on d 4 of infection**

30 Bacterial loads of at least 6 animals per group were determined in livers (A) and  
31 spleens (B) of randomly selected animals on d 4 post-infection. CFU data were log-  
32 transformed and compared by means of ANOVA with Tukey's post hoc test. All statistically  
33 significant differences are indicated as lines as in figure 3.

34

1 **Supplementary figure 4.**

2 **Spleen weight on d 2 and d 4 of infection as a measure of disease severity**

3 *Hfe*<sup>-/-</sup> and congenic C57BL/6 WT animals (*Hfe*<sup>+/+</sup>) were fed either a standard iron-  
4 adequate diet (IA) or an iron-enriched diet (IE) and infected i.p. with 500 CFU of *S.*  
5 Typhimurium (*S. Tm.*). Mock-infected controls (Ctrl.) received diluent. Spleen weights of at  
6 least 6 mice per group were determined on d 2 (A) and d 4 (B) post-infection. Data are  
7 presented and compared as in figure 1.
